1 **TAEL 2.0: An Improved Optogenetic Expression System for Zebrafish**

2 Jesselynn LaBelle<sup>1</sup>, Adela Ramos-Martinez<sup>1</sup>, Kyle Shen<sup>1</sup>, Laura B. Motta-Mena<sup>2</sup>, Kevin H.

3 Gardner<sup>3-5</sup>, Stefan C. Materna<sup>1</sup>, and Stephanie Woo<sup>1,6</sup>

4 <sup>1</sup>Department of Molecular Cell Biology, University of California, Merced, CA 95343 USA.

5 <sup>2</sup>Optologix, Inc., Dallas, TX 75201 USA. <sup>3</sup>Structural Biology Initiative, Advanced Science

6 Research Center, CUNY; New York, NY, 10031, USA. <sup>4</sup>Department of Chemistry &

7 Biochemistry, City College of New York, New York, USA. <sup>5</sup>Ph.D. Programs in Biochemistry,

8 Biology, and Chemistry, The Graduate Center, City University of New York, New York, USA.

9 <sup>6</sup>Author for correspondence. Mailing address: 5200 N. Lake Rd., Merced, CA 95348 USA.

10 Email: swoo6@ucmerced.edu

11 Key Words: Zebrafish, Optogenetics, Gene expression, Light-activated transcription factor

1 **Abstract**

2 Inducible gene expression systems are valuable tools for studying biological processes. We  
3 previously developed an optogenetic gene expression system called TAEI that is optimized for  
4 use in zebrafish. When illuminated with blue light, TAEI transcription factors dimerize and  
5 activate gene expression downstream of the TAEI-responsive C120 promoter. By using light as  
6 the inducing agent, the TAEI/C120 system overcomes limitations of traditional inducible  
7 expression systems by enabling fine spatial and temporal regulation of gene expression. Here,  
8 we describe ongoing efforts to improve the TAEI/C120 system. We made modifications to both  
9 the TAEI transcriptional activator and the C120 regulatory element, collectively referred to as  
10 TAEI 2.0. We demonstrate that TAEI 2.0 consistently induces higher levels of reporter gene  
11 expression and at a faster rate, but with comparable background and toxicity as the original  
12 TAEI system. With these improvements, we were able to create functional stable transgenic  
13 lines to express the TAEI 2.0 transcription factor either ubiquitously or with a tissue-specific  
14 promoter. We demonstrate that the ubiquitous line in particular can be used to induce  
15 expression at late embryonic and larval stages, addressing a major deficiency of the original  
16 TAEI system. [This improved optogenetic expression system will be a broadly useful resource](#)  
17 [for the zebrafish community.](#)

18

## 1 **Introduction**

2 Inducible gene expression systems are valuable tools for studying biological processes as they  
3 enable user-defined control over the timing, location, and level of expression. In zebrafish and  
4 other model organisms, the most widely used inducible expression systems fall into two broad  
5 categories – those that rely on the heat shock response<sup>1</sup> and those using small molecule  
6 inducing agents<sup>2</sup>. More recently, optogenetic approaches have been developed based on light-  
7 sensitive transcription factors<sup>3-6</sup>. One such system is based on EL222, a naturally occurring blue  
8 light-activated transcription factor found in the bacterium *Erythrobacter litoralis* HTCC2594. The  
9 endogenous transcription factor contains a light-oxygen-voltage-sensing (LOV) domain that in  
10 response to blue light (450 nm) undergoes a conformational change and dimerizes, allowing it  
11 to bind and initiate transcription from a regulatory element termed C120<sup>7</sup>. EL222 was the basis  
12 for an inducible expression system designed for mammalian cell culture<sup>8</sup>. Our group previously  
13 designed EL222 for use in zebrafish by fusing it to a KalTA4 transcriptional activation domain,  
14 which minimized toxicity in zebrafish embryos while still maintaining functionality<sup>6</sup>. We  
15 demonstrated that this KalTA4-EL222 fusion protein, which we termed TAEL, could be  
16 combined with C120-containing transgenes to achieve light-inducible expression of multiple  
17 genes of interest. We also validated multiple approaches for delivering patterned blue light  
18 illumination to spatially and temporally control induction in zebrafish embryos. However, we  
19 were unable to establish stable transgenic lines for TAEL expression that could induce  
20 expression from our C120 reporter lines, suggesting that TAEL and/or the C120 promoter could  
21 be further optimized.

22

23 In this study, we present ongoing efforts to improve the function of the TAEL/C120 system. We  
24 made changes to both the TAEL transcriptional activator and the C120 promoter, collectively  
25 termed TAEL 2.0, that produce significantly higher levels of light-induced expression at a faster  
26 rate. Importantly, these improvements allowed us to address a major deficiency of our

1 previously published system (referred to here as TAEL 1.0), namely the lack of functional, stable  
2 transgenic lines for both TAEL and C120 components. Here, we describe the generation of  
3 transgenic lines that express functional TAEL 2.0 components either ubiquitously or in the  
4 developing endoderm. We demonstrate that the ubiquitous line in particular can be used to  
5 induce expression at late embryonic and larval stages, extending the use of this system beyond  
6 early embryo stages.

7

## 8 **Materials and Methods**

9

### 10 **Vector construction and mRNA synthesis**

11 *pμTol2 backbone.* For expression plasmids and transgenes created for this study, we generated  
12 a minimal plasmid backbone called pμTol2, which can be used for both Tol2-based  
13 transgenesis and in vitro mRNA synthesis. Its short length of 2520 base pairs enables  
14 modification of inserts by PCR through the backbone, thus eliminating the need to subclone. In  
15 brief, pμTol2 was constructed by Gibson assembly, fusing the Tol2 sites for genomic  
16 integration<sup>9</sup> with the commonly used expression cassette of pCS2 including polylinkers and  
17 SV40 polyadenylation site<sup>10,11</sup> and a plasmid backbone derived from pUC19<sup>12</sup>. To ensure  
18 efficient protein synthesis, all plasmids newly constructed for this study contain the zebrafish-  
19 optimized Kozak sequence 5'-GCAAACatgG-3', where the lower case "atg" denotes the start  
20 codon<sup>13</sup>.

21

22 *Expression plasmids.* pCS2-TAEL has been described previously<sup>6</sup>. To construct expression  
23 plasmids pμTol2-N-TAEL, Optologix, Inc. (Dallas, TX) provided synthesized oligomers  
24 containing the SV40 large T-antigen nuclear localization signal. We fused these to the 5' end of  
25 the TAEL ORF and to the pμTol2 backbone by Gibson assembly<sup>14</sup>. Similarly, pμTol2-TAEL-N  
26 was constructed by fusing synthesized oligomers containing the nucleoplasmin nuclear

1 localization signal (also provided by Optologix, Inc.) to the 3' end of the TAEI ORF by Gibson  
2 assembly<sup>14</sup>. Capped messenger RNA was synthesized using mMESSAGe mMACHINE SP6 kit  
3 (Ambion) with plasmids cut with NotI as linear template. For experiments in Fig. 1–3,  
4 Tg(C120:mCherry;cryaa:Venus) or Tg(C120F:mCherry) males were crossed to wild-type  
5 females and resulting embryos were each injected with ~50 pg of TAEI, N-TAEI, or TAEI-N  
6 mRNA at the 1-cell stage.

7  
8 *Transgene plasmids.* To construct p $\mu$ Tol2-C120F:mCherry, the mouse *Fos* basal promoter  
9 sequence: 5'-CCAGTGACGTAGGAAGTCCATCCATTCACAGCGCTTC-  
10 TATAAAGGCGCCAGCTGAGGCGCCTACTACTCCAACCGCGACTGCAGCGAGCAACT -3'<sup>15</sup>  
11 was synthesized by Integrated DNA Technologies and the C120 sequence<sup>6</sup> was amplified by  
12 PCR. These sequences were fused together and inserted into p $\mu$ Tol2 by Gibson assembly. The  
13 transgene plasmid p $\mu$ Tol2-C120F:GFP was constructed by separate PCR amplification of the  
14 C120F promoter and GFP ORF which were then cloned into p $\mu$ Tol2 by Gibson assembly.  
15 p $\mu$ Tol2-sox17:TAEI-N was constructed by separate PCR amplification of the *sox17* promoter<sup>16</sup>  
16 and TAEI-N ORF which were then cloned into p $\mu$ Tol2 by Gibson assembly. p $\mu$ Tol2-ubb:TAEI-  
17 N was constructed by separate PCR amplification of the *ubb* promoter<sup>17</sup> and TAEI-N ORF,  
18 which were then cloned into p $\mu$ Tol2 by Gibson assembly.

19

20 [All plasmids constructed for this study are available by direct request.](#)

21

## 22 **Zebrafish Strains**

23 Adult *Danio rerio* zebrafish were maintained under standard laboratory conditions. Zebrafish in  
24 an outbred AB, TL, or EKW background were used as wildtype strains.

25 Tg(C120:mCherry;cryaa:Venus)<sup>sfc14</sup>, referred to here as Tg(C120T:mCherry), has been  
26 previously described<sup>6</sup>. Tg(C120-Mmu.Fos:mCherry)<sup>ucm104</sup>, Tg(C120-Mmu.Fos:GFP)<sup>ucm107</sup>,

1 *Tg(ubb:TAEL-N)<sup>ucm113</sup>*, and *Tg(sox17:TAEL-N)<sup>ucm114</sup>* were generated using standard  
2 transgenesis protocols<sup>9,18</sup>. This study was performed with the approval of the Institutional Animal  
3 Care and Use Committee (IACUC) of the University of California Merced.

#### 4 5 **Global light induction**

6 Global light induction was provided by a MARS AQUA-165-55 110W LED aquarium hood.  
7 Actual power of light received by embryos (lids of plates removed) was measured as ~1.6 mW/  
8 cm<sup>2</sup> at 456 nm. For experiments in Fig. 1–2, 4 hpf (hours post-fertilization) embryos were  
9 illuminated with constant blue light for 1–3 hours. For experiments in Fig. 3–6, a timer was used  
10 to apply constant or pulsed light (NEARPOW Timer Switch). Dark controls were placed in a light  
11 proof box in the same 28.5°C incubator as the light-treated samples.

#### 12 13 **Real-time quantitative PCR**

14 To quantify light-induced expression, total RNA from 30–50 light-treated or dark control embryos  
15 was extracted using the illustra<sup>TM</sup> RNAspin Mini kit (GE Healthcare). 1 µg total RNA was used  
16 for reverse transcription with qScript XLT cDNA SuperMix (Quantabio). Each qPCR reaction  
17 contained 2X PerfeCTa<sup>®</sup> SYBR green fast mix (Quantabio), 5-fold diluted cDNA and 325 nM  
18 each primer. Reactions were carried out on a QuantStudio3 (Applied Biosystems) real time PCR  
19 machine using the following program: initial activation at 95°C for 10 min, followed by 40 cycles  
20 of 30 s at 95°C, 30 s at 60°C and 1 min at 72°C. Once the PCR was completed, a melt curve  
21 analysis was performed to determine reaction specificity. Data represent averages from 3–5  
22 biological replicates, each with three technical replicates. The housekeeping gene *ef1a* was  
23 used as a reference. Fold change was calculated using the  $2^{(-\Delta\Delta CT)}$  method<sup>19</sup>. [Statistical](#)  
24 [significance was determined by Welch's t-test \(unless otherwise stated\) using Prism software](#)  
25 [\(GraphPad\)](#). qPCR primers used are: mcherry forward: 5'-GACCACCTACAAGGCCAAGA-3';

1 mcherry reverse: 5'-CTCGTTGTGGGAGGTGATGA-3'; ef1a forward 5'-  
2 CACGGTGACAACATGCTGGAG-3'; ef1a reverse: 5'-CAAGAAGAGTAGTACCGCTAGCAT-3'

3

#### 4 **Microscopy and image processing**

5 Fluorescence and brightfield images were acquired on a Leica dissecting stereomicroscope or  
6 Olympus dissecting stereomicroscope. Dechorionated embryos or larvae were embedded in  
7 1.5% low-melting agarose (ISC BioExpress) containing 0.01% tricaine (Sigma-Aldrich) within  
8 glass-bottom Petri dishes (MatTek Corporation). Standard filter settings were applied and  
9 brightfield and fluorescence images were merged after acquisition. Identical exposure settings  
10 for fluorescence images were used for all embryos from the same set of experiments. [All image  
11 processing was performed using ImageJ software<sup>20</sup>](#). Illustrations were created with BioRender  
12 (<https://biorender.com/>).

13

#### 14 **Results**

15

#### 16 **TAEL-induced expression is increased by coupling the C120 regulatory element to a *Fos* 17 basal promoter**

18 In our previously published system, the TAEL-responsive C120 regulatory sequence was  
19 coupled to a minimal TATA box<sup>6,8</sup>. Because this minimal TATA box originated from a  
20 mammalian expression vector, we reasoned that using a zebrafish-optimized basal promoter  
21 instead would improve performance of the TAEL system. The basal promoter from the mouse  
22 *Fos* gene was previously shown to function well in zebrafish transgenes, allowing for high  
23 expression levels with minimal background<sup>15,21</sup>. Therefore, we constructed a new TAEL-  
24 responsive promoter consisting of 5 repeats of the C120 regulatory sequence coupled to the  
25 mouse *Fos* basal promoter (*C120-Mmu.Fos*, abbreviated throughout as *C120F*). We then  
26 determined whether this new C120 promoter improves light-induced expression compared to

1 the previous TATA box-containing version (Fig. 1). First, we generated a stable transgenic  
2 zebrafish line using *C120F* to control expression of an mCherry reporter (*Tg(C120F:mCherry)*)  
3 to make direct comparisons to our previously published reporter line<sup>6</sup>, referred to here as  
4 *Tg(C120T:mCherry)*. We injected both *Tg(C120T:mCherry)* and *Tg(C120F:mCherry)* embryos  
5 with ~50 pg TAEL mRNA then globally illuminated them with blue light starting at 3 hpf. qPCR  
6 analysis showed that compared to sibling control embryos kept in the dark, mCherry expression  
7 was induced  $43.5^{+10.6}_{-8.5}$ -fold in *Tg(C120F:mCherry)* embryos, which was significantly higher than  
8 the  $2.9^{+1.2}_{-0.8}$ -fold induction in *Tg(C120T:mCherry)* embryos ( $p=0.0009$ ) (Fig. 1C). Consistent with  
9 these results, mCherry fluorescence was qualitatively brighter in *Tg(C120F:mCherry)* embryos  
10 compared to *Tg(C120T:mCherry)* embryos (Fig. 1D-E). Importantly, we did not observe  
11 mCherry fluorescence in embryos kept in the dark for either genotype (Fig. 1F-G). Together,  
12 these results suggest that coupling the C120 regulatory element with a *Fos* basal promoter  
13 instead of a minimal TATA box significantly increases TAEL-induced gene expression while  
14 maintaining low background expression.

15

## 16 **TAEL-induced expression is increased by adding a C-terminal nuclear localization signal** 17 **to TAEL**

18 Our original TAEL construct consists of a Kal-TA4 transcription activation domain, the light-  
19 sensitive LOV domain, and a DNA-binding domain that recognizes the C120 sequence but does  
20 not contain an explicit nuclear localization signal (NLS). Although TAEL can likely enter the  
21 nucleus through diffusion, because of its relatively small size of 257 amino acids, we wanted to  
22 test whether targeting TAEL specifically to the nucleus by adding an NLS would increase the  
23 amplitude of induction and improve light-induced expression (Fig. 2).

24



1 We first generated a construct in which the SV40 large T-antigen NLS was fused to the amino  
2 terminus of TAEL (N-TAEL). When delivered by mRNA injection into *Tg(C120F:mCherry)*  
3 embryos, we were surprised to find that N-TAEL induced mCherry expression less strongly  
4 ( $47.7^{+81.3}_{-30.0}$ -fold) than the original TAEL protein ( $81.7^{+69.8}_{-37.7}$ -fold;  $p=0.3398$ ) (Fig. 2C). Consistent  
5 with these qPCR results, mCherry fluorescence was more variable and often dimmer in  
6 embryos injected with N-TAEL versus TAEL mRNA (Fig. 2D-E). We speculated that fusing the  
7 NLS to the N-terminus of TAEL places it directly adjacent to the K<sub>al</sub>TA4 transcriptional  
8 activation domain, which may negatively interfere with transactivation. Therefore, we generated  
9 a construct in which the nucleoplasmin NLS was fused to the carboxy terminus of TAEL (TAEL-  
10 N). By qPCR analysis, *Tg(C120F:mCherry)* embryos injected with TAEL-N mRNA showed  
11 higher levels of mCherry induction ( $176.5^{+87.6}_{-58.5}$ -fold) compared to both TAEL ( $p=0.053$ ) and N-  
12 TAEL ( $p=0.0392$ ) (Fig. 2C). As expected, mCherry fluorescence was brightest in embryos  
13 injected with TAEL-N (Fig. 2F). We did not observe mCherry fluorescence in any injected  
14 embryos kept in the dark (Fig. 2G-I). Together, these results demonstrate that adding a nuclear  
15 localization signal at the C-terminus of TAEL further increases light-induced gene expression  
16 with minimal background.

17

### 18 **TAEL 2.0 induces higher expression levels at a faster rate**

19 We next characterized the effects of combining the modifications we made to the C120  
20 promoter and TAEL transcriptional activator. [With our previously published TAEL system, we](#)  
21 [found that sustained activation of gene expression over several hours could be achieved by](#)  
22 [pulsing the activating blue light at 1 hour on/off intervals<sup>6</sup>; under this illumination regime, peak](#)  
23 [expression levels were reached by 3 hours post-activation and sustained for up to 8 hours. To](#)  
24 [determine if TAEL 2.0 improves the kinetics and/or range of light-induced expression, we](#)  
25 [performed a similar time course of mCherry induction comparing \*Tg\(C120T:mCherry\)\* embryos](#)

1 injected with TAEI mRNA (“TAEI 1.0”) to *Tg(C120F:mcherry)* embryos injected with TAEI-N  
2 mRNA (“TAEI 2.0”). Starting at approximately 3 hpf, mCherry expression was activated by  
3 globally illuminating embryos with pulsed blue light (1 hour on, 1 hour off), and mCherry  
4 expression levels were measured by qRT-PCR at various timepoints up to 9 hours **post-**  
5 **activation (Fig. 3)**. Throughout the entire time course, we found that TAEI 2.0 induced  
6 significantly higher mCherry expression compared to TAEI 1.0 (2-way ANOVA,  $p < 0.0001$ ). We  
7 further found that the rate of induction also improved. At 1 hour **post-activation**, mCherry  
8 expression had increased by  $738.6^{+749.2}_{-379.9}$ -fold with TAEI 2.0 compared to  $89.1^{+54.0}_{-33.6}$ -fold with  
9 TAEI 1.0. Finally, we found that these high levels of induction with TAEI 2.0 could be sustained  
10 for up to 9 hours under pulsed (1 hour on/off) illumination. Together, these results demonstrate  
11 that the combined modifications we made to the TAEI system improve both the range and  
12 induction kinetics of this light-activated expression system.

13

#### 14 **TAEI 2.0 modifications enable functional stable transgenic lines of TAEI components**

15 One notable deficiency of our previous TAEI system was the lack of functional stable  
16 transgenic lines expressing the TAEI transcriptional activator. With its greatly increased  
17 amplitude and kinetics of induction, we determined whether TAEI 2.0 could address this  
18 previous limitation.

19

20 We generated a stable transgenic line, *Tg(sox17:TAEI-N)*, to express TAEI-N under the *sox17*  
21 promoter, which drives expression in the endoderm and dorsal forerunner cells (DFCs)<sup>16</sup>. We  
22 crossed this line with a *Tg(C120F:GFP)* reporter line. The resulting double transgenic embryos  
23 were globally illuminated with pulsed blue light (1 hour on/off) or kept in the dark from 6–18 hpf  
24 (Fig. 4A). We observed GFP fluorescence in derivatives of the endoderm such as the gut tube  
25 and the pharyngeal endoderm as well as derivatives of the dorsal forerunner cells (DFCs) within  
26 the tail mesoderm in illuminated embryos but not those kept in the dark (Fig. 4B-E). Because

1 activating blue light was applied globally, this result suggested that TAEL-N functions in, and is  
2 restricted to, the *sox17* expression domain. Additionally, we observed that the intensity of GFP  
3 fluorescence was brightest in the tail (Fig. 4B-C), again consistent with the known *sox17*  
4 expression pattern, which is highest in the DFCs. In sum, we successfully generated a stable  
5 transgenic line to express TAEL-N that enables tissue-specific induction of a gene of interest  
6 even when activating blue light is applied globally.

7

8 One consequence of the lack of functional stable transgenic lines for TAEL 1.0 is that its use is  
9 limited to early embryonic stages. To determine if TAEL 2.0 modifications could expand the  
10 range of accessible developmental stages, we generated a stable transgenic line,  
11 *Tg(ubb:TAEL-N)*, to express TAEL-N under the *ubb* promoter. This promoter has been shown to  
12 drive ubiquitous expression at all developmental stages<sup>17</sup>. We crossed this line to  
13 *Tg(C120F:GFP)* then exposed double transgenic embryos to activating blue light at several  
14 different time points spanning embryonic to larval stages (Fig. 5A). In all cases, we observed  
15 increased GFP fluorescence in illuminated embryos or larva but not in control siblings that had  
16 been kept in the dark (Fig. 5B-G).

17

18 At 4 days post-fertilization (dpf), we observed GFP fluorescence in the livers of both illuminated  
19 and control larvae (arrows, Fig. 5D, G). This pattern appears specific to this *Tg(C120F:GFP)*  
20 line (when generating the line, we were only able to recover one founder with germline  
21 transmission of the transgene), and thus it is likely due to positional effects of transgene  
22 insertion. Our other zebrafish lines, including *Tg(C120F:mCherry)* (data not shown), do not  
23 display similar fluorescence indicating it is unlikely due to autofluorescence. We could still  
24 visually detect light-dependent GFP induction above this background expression (Fig. 5D),  
25 suggesting that despite its ectopic liver expression, the *C120F:GFP* reporter transgene is

1 functional at 4 dpf. Taken together, these results demonstrate that TAEI 2.0 can be used to  
2 induce expression in a broad range of developmental stages.

3

#### 4 **Fidelity of the TAEI 2.0 system**

5 A recent study showed that blue light alone can increase expression of *Fos* and other activity-  
6 dependent genes in cultured mouse cortical neurons<sup>22</sup>. Because the *C120F* promoter utilizes  
7 the basal promoter from the mouse *Fos* gene, it is possible that there are endogenous factors,  
8 especially in neural tissues, that can drive light-responsive expression from the *C120F*  
9 promoter. Such induction, independent of TAEI-N, would reduce the specificity of the TAEI 2.0  
10 system.

11

12 To determine whether the *C120F* promoter is activated in the absence of TAEI-N, we exposed  
13 *Tg(C120F:GFP)* zebrafish to blue light at 2 dpf or 4 dpf; the latter time point was chosen as  
14 light-driven neuronal activity likely increases over time. Apart from the ectopic liver expression at  
15 4 dpf described above, we did not observe appreciable GFP fluorescence in any animals (Fig.  
16 6A-D).

17

18 To better uncover any TAEI-N-independent function of the *C120F* promoter, we used qPCR to  
19 quantify and compare GFP expression in *Tg(C120F:GFP)* and *Tg(C120F:GFP);Tg(ubb:TAEI-*  
20 *N)* animals. At 2 dpf, we detected equally low levels of GFP expression in both *Tg(C120F:GFP)*  
21 and *Tg(C120F:GFP);Tg(ubb:TAEI-N)* embryos kept in the dark. The average GFP  $\Delta C_T$  values,  
22 normalized to the housekeeping gene *ef1a*, were  $9.93 \pm 0.22$  for *Tg(C120F:GFP)* and  $9.91 \pm 0.42$   
23 for *Tg(C120F:GFP);Tg(ubb:TAEI-N)* (Fig. 6E). Although these low levels are insufficient to  
24 produce visible amounts of GFP (see Fig. 6B), they suggest that the *C120F* promoter exhibits a  
25 small amount of basal activity. Notably, these data also indicate that background expression is  
26 independent of TAEI-N.

1

2 As expected, GFP expression increased in response to light in double transgenic embryos  
3 (*Tg(C120F:GFP);Tg(ubb:TAEL-N)*) by  $73^{+81.2}_{-38.5}$ -fold ( $p=0.0032$ ) (Fig. 6F). In contrast, GFP  
4 expression in light-exposed embryos that did not express TAEL-N (*Tg(C120F:GFP)*) increased  
5 by only  $1.5^{+0.3}_{-0.5}$ -fold. This was a slight but statistically significant difference ( $p=0.0386$ ). Given  
6 that we did not observe any visible GFP fluorescence in illuminated 2 dpf *Tg(C120F:GFP)*  
7 embryos (see Fig. 6A), this increase in GFP mRNA levels is unlikely to be functionally relevant.

8

9 At 4 dpf,  $\Delta C_T$  values showed elevated background (i.e., dark) GFP expression compared to 2  
10 dpf, presumably due to the ectopic liver expression in this transgenic line (Fig. 6E). The average  
11 GFP delta  $\Delta C_T$  values of larvae kept in the dark were  $6.2 \pm 0.82$  for *Tg(C120F:GFP)* and  
12  $7.32 \pm 0.16$  for *Tg(C120F:GFP);Tg(ubb:TAEL-N)* (Fig. 6E). Nevertheless, we could still detect a  
13 light-induced increase in GFP expression in *Tg(C120F:GFP);Tg(ubb:TAEL-N)* double transgenic  
14 larvae of  $6.6^{+3.8}_{-0.2}$ -fold ( $p=0.0025$ ) (Fig. 6F). Light induction of *Tg(C120F:GFP)* embryos led to an  
15 apparent  $2.5^{+1.2}_{-0.8}$ -fold decrease in GFP expression, but this was not statistically significant  
16 ( $p=0.1820$ ).

17

18 All together, these data show that in the absence of activated TAEL-N, basal activity of the  
19 *C120F* promoter is low and negligibly responsive to light, demonstrating fidelity of the TAEL 2.0  
20 system.

21

## 22 Discussion

23

24 In this study, we describe improvements we have made to a zebrafish-optimized optogenetic  
25 expression system called TAEL/C120. In the original TAEL/C120 system, a LOV domain-

1 containing transcription factor (TAEL) is used to drive expression of genes of interest  
2 downstream of the C120 regulatory element in response to blue light. The changes we made  
3 include adding a C-terminal nuclear localization signal to TAEL (TAEL-N) and coupling C120  
4 regulatory elements with a basal promoter taken from the mouse *Fos* gene (*C120F*). These  
5 improvements, collectively referred to as TAEL 2.0, significantly increased both the level and  
6 rate of light-induced expression.

7

8 Importantly, these improvements allowed us to generate functional stable transgenic lines for  
9 TAEL-N expression. Previously under TAEL 1.0, we had difficulties generating such transgenic  
10 lines, possibly due to sub-optimal performance of the TAEL transcriptional activator and/or  
11 sensitivity of the C120 promoter. We speculate that these deficiencies were overcome in TAEL  
12 1.0 by transiently expressing TAEL by mRNA or plasmid injection, which can deliver many more  
13 molecules of TAEL than can be achieved by transgene expression. However, this approach  
14 limits the applications for TAEL 1.0 as injections are labor intensive, introduce experimental  
15 variability, and often preclude use beyond early embryonic stages. In this study, the  
16 improvements we made to both the transcriptional activator (TAEL-N) and promoter (*C120F*)  
17 together allowed us to generate functional TAEL-N transgenic lines. Such lines can provide  
18 additional spatiotemporal specificity to gene induction, as demonstrated with the  
19 *Tg(sox17:TAEL-N)* line (Fig. 4). And, as shown with the *Tg(ubb:TAEL-N)* line (Fig. 5),  
20 transgenesis enables usage beyond early embryonic stages, which is not possible with mRNA  
21 delivery to the zygote.

22

23 Several different basal promoters have been used in zebrafish transgene and enhancer trap  
24 constructs, each with different characteristics<sup>15,21,23,24</sup>. For a synthetic expression system such  
25 as TAEL, an ideal basal promoter will cause negligible background expression while enabling  
26 high rates of transcription following induction. In our original TAEL 1.0 system, the *C120*

1 regulatory element is coupled to a minimal TATA box sequence taken from a mammalian  
2 expression vector<sup>6,8</sup>. Although it is easily inducible and causes low background, it is not  
3 optimized for use in zebrafish and may thus result in lower than desired expression levels. In  
4 this study, we replaced the minimal TATA box with the basal promoter of the mouse *Fos* gene,  
5 which was previously used in zebrafish transgenesis<sup>15,21</sup>. This modification alone resulted in  
6 more than 40-fold activation following illumination — a 15-fold increase over the original TAEL  
7 system (Fig. 1C). Although the *Fos* basal promoter is derived from a gene well-known for its  
8 activation in response to neuronal activity<sup>25</sup>, our experiments indicate that coupling this basal  
9 promoter to the C120 regulatory sequence imparts several desirable attributes to the TAEL  
10 system (fast induction, low background, high amplitude) that extend to the whole organism. For  
11 cell type-specific applications, further improvement may be possible by choosing a different  
12 basal promoter optimized for that cell type.

13  
14 TAEL 2.0 joins a growing toolkit for light-controlled gene expression in zebrafish. Other light-  
15 gated transcriptional activators shown to function in zebrafish include GAVPO<sup>4,26</sup>, a  
16 cryptochrome (CRY2/CIB1)-based system<sup>3</sup>, and a phytochrome (Phy/PIF)-based system<sup>27</sup>.  
17 Although all are capable of driving light-induced gene expression, each system possesses  
18 distinct qualities that users could leverage for different applications. The phytochrome-based  
19 system is responsive to red and far-red light, while TAEL-N, GAVPO, and the cryptochrome-  
20 based system are responsive to blue light. The GAVPO, cryptochrome-, and phytochrome-  
21 based systems were developed by fusing light-sensitive protein domains to the yeast Gal4  
22 transcriptional activator allowing them to be combined with existing *UAS* transgenic lines. In  
23 contrast, EL222, from which TAEL-N is derived, was engineered from an endogenously  
24 occurring light-activated bacterial transcription system with its own regulatory element (*C120*),  
25 making it orthogonal to Gal4/*UAS* approaches. Both the cryptochrome- and phytochrome-based  
26 transcriptional activators operate as heterodimers (CRY2/CIB1 and Phy/PIF, respectively) while

1 TAEI-N functions as a homodimer, potentially simplifying experimental design by having one  
2 less component to express. The stability of the activated state of each of these transcriptional  
3 activators also varies. Activated GAVPO has a relatively long half-life of approximately 2 hours<sup>4</sup>,  
4 making it suitable for “cellular memory” applications while activated EL222 and, presumably, N-  
5 TAEI have an estimated half-life of 30 seconds<sup>8</sup>, making it ideal for applications where precise  
6 on/off control is desired. In short, the properties of TAEI 2.0 are complementary to these other  
7 optogenetic expression systems, and users should feel empowered to choose the system best  
8 suited for their intended applications.

9  
10 With the improvements that we have made, we envision TAEI 2.0 will facilitate a broad range of  
11 applications including lineage tracing and precise targeting (spatially and temporally) of gene  
12 perturbations. One major advantage of TAEI 2.0 is the extension of these applications beyond  
13 early embryonic stages through transgene-directed expression of the TAEI-N transcription  
14 factor. This improved zebrafish-optimized light-gated gene expression system should be a  
15 broadly useful resource for the zebrafish community.

## 17 **Acknowledgements**

18  
19 We thank Anna Reade, Didier Stainier, and Orion Weiner for support and advice during early  
20 stages of this work. We thank members of the Woo and Materna labs for providing insightful  
21 comments throughout the work and especially on the manuscript. We thank Chris Amemiya for  
22 generously providing access to the Lecia stereomicroscope. We thank Roy Hoglund, Emily  
23 Slocum, and their staff for excellent zebrafish care. This work was funded by grants from the  
24 National Institutes of Health (NIH) (R03 DK106358) and the University of California Cancer  
25 Research Coordinating Committee (CRN-20-636896) to S.W. K.S. received support from the



1 NSF-CREST: Center for Cellular and Biomolecular Machines at the University of California,  
2 Merced (NSF-HRD-1547848). K.H.G. acknowledges support from NIH (R01 GM106239).

3

#### 4 **Competing Interests**

5 L.B.M-M. and K.H.G were co-founders of Optologix, Inc., which developed light-gated  
6 transcription factors for research applications. As of September 2020, Optologix, Inc. has  
7 ceased business.

8

1 **References:**

2

- 3 1. Halloran, M. C., Sato-Maeda, M., Warren, J. T., Su, F., Lele, Z., Krone, P. H., Kuwada, J.  
4 Y. & Shoji, W. Laser-induced gene expression in specific cells of transgenic zebrafish.  
5 *Development* **127**, 1953–1960 (2000).
- 6 2. Knopf, F., Schnabel, K., Haase, C., Pfeifer, K., Anastassiadis, K. & Weidinger, G. Dually  
7 inducible TetON systems for tissue-specific conditional gene expression in zebrafish.  
8 *Proc. Natl. Acad. Sci. U.S.A.* **107**, 19933–19938 (2010).
- 9 3. Liu, H., Gomez, G., Lin, S., Lin, S. & Lin, C. Optogenetic control of transcription in  
10 zebrafish. *PLoS ONE* **7**, e50738 (2012).
- 11 4. Wang, X., Chen, X. & Yang, Y. Spatiotemporal control of gene expression by a light-  
12 switchable transgene system. *Nat. Methods* **9**, 266–269 (2012).
- 13 5. Chen, X., Wang, X., Du, Z., Ma, Z. & Yang, Y. Spatiotemporal control of gene expression  
14 in mammalian cells and in mice using the LightOn system. *Curr Protoc Chem Biol* **5**, 111–  
15 129 (2013).
- 16 6. Reade, A., Motta-Mena, L. B., Gardner, K. H., Stainier, D. Y., Weiner, O. D. & Woo, S.  
17 TAEL: a zebrafish-optimized optogenetic gene expression system with fine spatial and  
18 temporal control. *Development* **144**, 345–355 (2017).
- 19 7. Rivera-Cancel, G., Motta-Mena, L. B. & Gardner, K. H. Identification of natural and  
20 artificial DNA substrates for light-activated LOV-HTH transcription factor EL222.  
21 *Biochemistry* **51**, 10024–10034 (2012).
- 22 8. Motta-Mena, L. B., Reade, A., Mallory, M. J., Glantz, S., Weiner, O. D., Lynch, K. W. &  
23 Gardner, K. H. An optogenetic gene expression system with rapid activation and  
24 deactivation kinetics. *Nat. Chem. Biol.* **10**, 196–202 (2014).

- 1 9. Kawakami, K., Takeda, H., Kawakami, N., Kobayashi, M., Matsuda, N. & Mishina, M. A  
2 transposon-mediated gene trap approach identifies developmentally regulated genes in  
3 zebrafish. *Dev. Cell* **7**, 133–144 (2004).
- 4 10. Rupp, R. A., Snider, L. & Weintraub, H. Xenopus embryos regulate the nuclear  
5 localization of XMyoD. *Genes Dev.* **8**, 1311–1323 (1994).
- 6 11. Turner, D. L. & Weintraub, H. Expression of achaete-scute homolog 3 in Xenopus  
7 embryos converts ectodermal cells to a neural fate. *Genes Dev.* **8**, 1434–1447 (1994).
- 8 12. Norrander, J., Kempe, T. & Messing, J. Construction of improved M13 vectors using  
9 oligodeoxynucleotide-directed mutagenesis. *Gene* **26**, 101–106 (1983).
- 10 13. Grzegorski, S. J., Chiari, E. F., Robbins, A., Kish, P. E. & Kahana, A. Natural variability of  
11 Kozak sequences correlates with function in a zebrafish model. *PLoS ONE* **9**, e108475  
12 (2014).
- 13 14. Gibson, D. G., Young, L., Chuang, R.-Y., Venter, J. C., Hutchison, C. A. & Smith, H. O.  
14 Enzymatic assembly of DNA molecules up to several hundred kilobases. *Nat. Methods* **6**,  
15 343–345 (2009).
- 16 15. Scott, E. K. & Baier, H. The cellular architecture of the larval zebrafish tectum, as  
17 revealed by gal4 enhancer trap lines. *Front Neural Circuits* **3**, 13 (2009).
- 18 16. Mizoguchi, T., Verkade, H., Heath, J. K., Kuroiwa, A. & Kikuchi, Y. Sdf1/Cxcr4 signaling  
19 controls the dorsal migration of endodermal cells during zebrafish gastrulation.  
20 *Development* **135**, 2521–2529 (2008).
- 21 17. Mosimann, C., Kaufman, C. K., Li, P., Pugach, E. K., Tamplin, O. J. & Zon, L. I.  
22 Ubiquitous transgene expression and Cre-based recombination driven by the ubiquitin  
23 promoter in zebrafish. *Development* **138**, 169–177 (2011).
- 24 18. Clark, K. J., Urban, M. D., Skuster, K. J. & Ekker, S. C. Transgenic zebrafish using  
25 transposable elements. *Methods Cell Biol.* **104**, 137–149 (2011).

- 1 19. Livak, K. J. & Schmittgen, T. D. Analysis of relative gene expression data using real-time  
2 quantitative PCR and the 2(-Delta Delta C(T)) Method. *Methods* **25**, 402–408 (2001).
- 3 20. Schneider, C. A., Rasband, W. S. & Eliceiri, K. W. NIH Image to ImageJ: 25 years of  
4 image analysis. *Nat. Methods* **9**, 671–675 (2012).
- 5 21. Dorsky, R. I., Sheldahl, L. C. & Moon, R. T. A transgenic Lef1/beta-catenin-dependent  
6 reporter is expressed in spatially restricted domains throughout zebrafish development.  
7 *Dev. Biol.* **241**, 229–237 (2002).
- 8 22. Tyssowski, K. M. & Gray, J. M. Blue Light Increases Neuronal Activity-Regulated Gene  
9 Expression in the Absence of Optogenetic Proteins. *eNeuro* **6**, ENEURO.0085–19.2019  
10 (2019).
- 11 23. Scheer, N. & Campos-Ortega, J. A. Use of the Gal4-UAS technique for targeted gene  
12 expression in the zebrafish. *Mech. Dev.* **80**, 153–158 (1999).
- 13 24. Scott, E. K., Mason, L., Arrenberg, A. B., Ziv, L., Gosse, N. J., Xiao, T., Chi, N. C.,  
14 Asakawa, K., Kawakami, K. & Baier, H. Targeting neural circuitry in zebrafish using GAL4  
15 enhancer trapping. *Nat. Methods* **4**, 323–326 (2007).
- 16 25. Schoenenberger, P., Gerosa, D. & Oertner, T. G. Temporal control of immediate early  
17 gene induction by light. *PLoS ONE* **4**, e8185 (2009).
- 18 26. Mruk, K., Ciepla, P., Piza, P. A., Alnaqib, M. A. & Chen, J. K. Targeted cell ablation in  
19 zebrafish using optogenetic transcriptional control. *Development* **147**, dev183640 (2020).
- 20 27. Shimizu-Sato, S., Huq, E., Tepperman, J. M. & Quail, P. H. A light-switchable gene  
21 promoter system. *Nat. Biotechnol.* **20**, 1041–1044 (2002).

22

1 **Figure Legends**

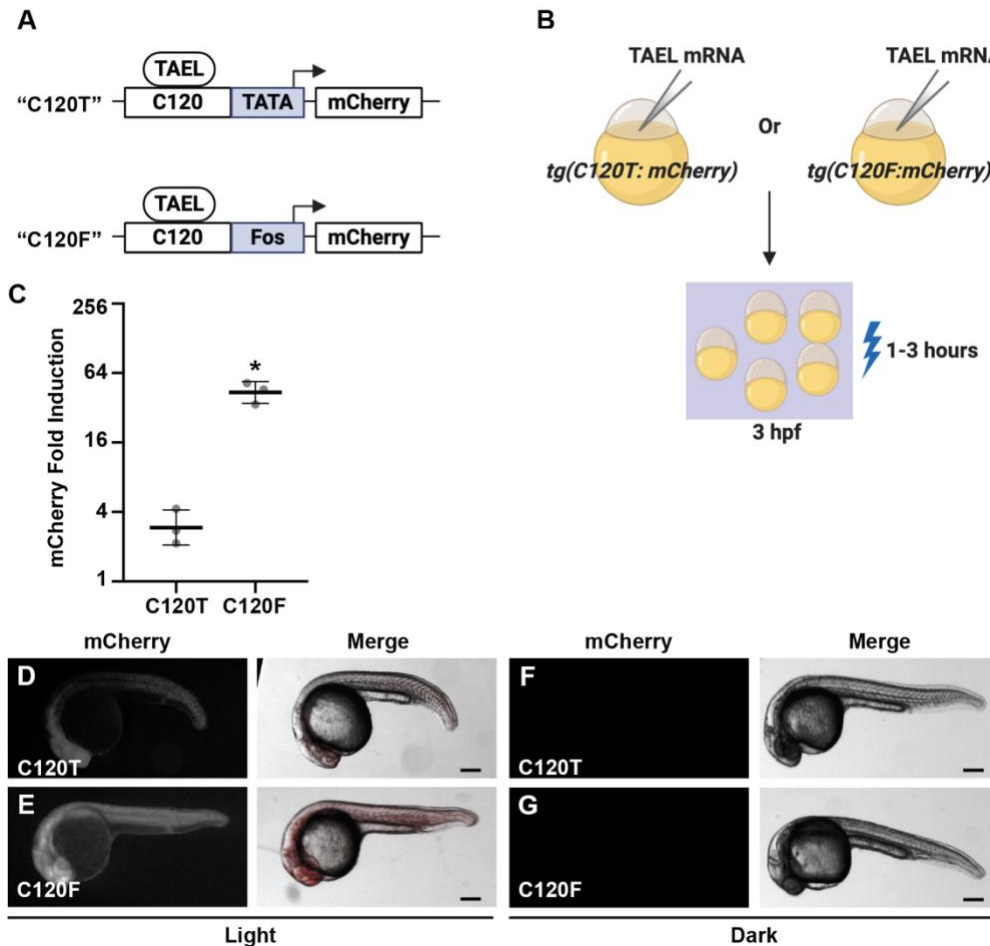

2

3 **Figure 1. Coupling the C120 regulatory element to the Fos basal promoter significantly**  
 4 **increases light-induced expression. A.** Schematic comparing different C120-based reporter  
 5 constructs in which TAEL-responsive C120 sequences (C120) were coupled to either a minimal  
 6 TATA box (TATA) or the basal promoter from the mouse *Fos* gene (*Fos*) and used to drive  
 7 expression of mCherry. **B.** Schematic of experimental design. *Tg(C120T:mCherry)* or  
 8 *Tg(C120F:mCherry)* embryos were injected with TAEL mRNA. mCherry expression was  
 9 induced by illuminating embryos with blue light starting at 3 hours post-fertilization (hpf). **C.**  
 10 Comparison of light-induced mCherry expression in *Tg(C120T:mCherry)* and  
 11 *Tg(C120F:mCherry)* embryos injected with TAEL mRNA. mCherry transcript levels were  
 12 measured by qPCR from embryos illuminated with blue light for 1 hour and compared to sibling

1 embryos kept in the dark. **Y-axis is set at  $\log_2$  scale.** Dots represent biological replicates. Solid  
2 lines represent mean. Error bars represent S.D. \* $p < 0.05$ . **D-G.** Representative images of  
3 mCherry fluorescence in *Tg(C120T:mCherry)* (D, F) or *Tg(C120F:mCherry)* (E, G) embryos  
4 injected with TAEL mRNA and illuminated with blue light for 3 hours (D, E) or kept in the dark  
5 (F, G). Images were acquired between 20 and 24 hours post-illumination. Scale bars, 200  $\mu\text{m}$ .  
6

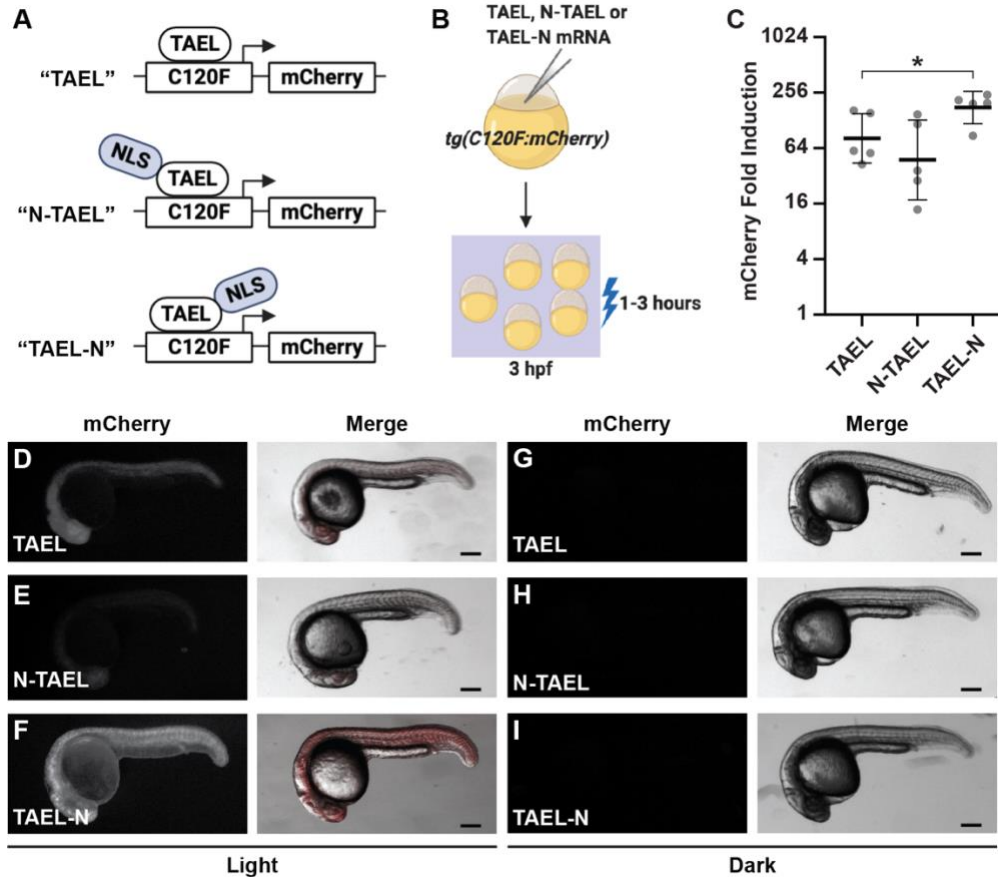

1  
2 **Figure 2. Adding a C-terminal nuclear localization signal (NLS) to TAEL significantly**  
3 **increases light-induced expression. A.** Schematic comparing different TAEL constructs  
4 containing no NLS (TAEL), one N-terminal NLS (N-TAEL), or one C-terminal NLS (TAEL-N). **B.**  
5 Schematic of experimental design. *Tg(C120F:mCherry)* embryos were injected TAEL, N-TAEL,  
6 or TAEL-N mRNA. mCherry expression was induced by illuminating embryos with blue light  
7 starting at 3 hours post-fertilization (hpf). **C.** Comparison of light-induced mCherry expression in  
8 *Tg(C120F:mCherry)* embryos injected with TAEL, N-TAEL, or TAEL-N mRNA. mCherry  
9 transcript levels were measured by qPCR from embryos illuminated with blue light for 1 hour  
10 and compared to sibling embryos kept in the dark. Y-axis is set at log<sub>2</sub> scale. Dots represent  
11 biological replicates. Solid lines represent mean. Error bars represent S.D. \*p<0.05. **D-I.**  
12 Representative images of mCherry fluorescence in *Tg(C120F:mCherry)* embryos injected with  
13 TAEL (D, G), N-TAEL (E, H), or TAEL-N (F, I) mRNA and illuminated with blue light for 3 hours

- 1 (D-F) or kept in the dark (G-I). Images were acquired between 20 and 24 hours post-
- 2 illumination. Scale bars, 200  $\mu\text{m}$ .
- 3



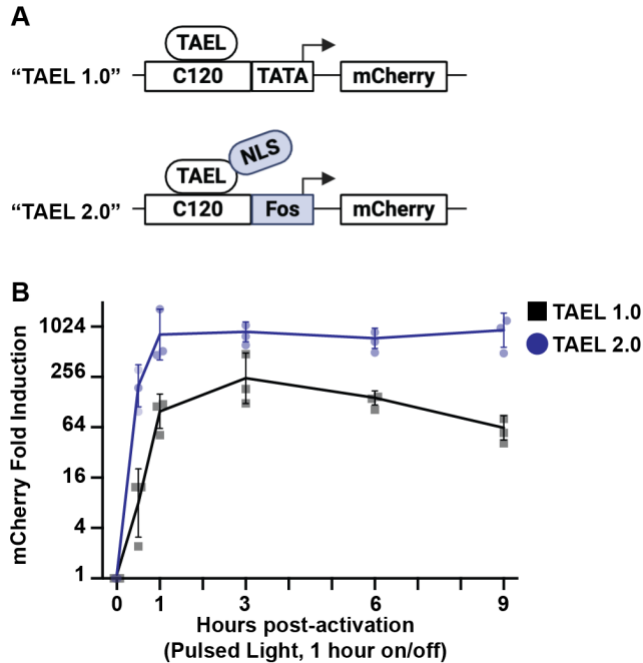

1

2 **Figure 3. TAE1.2.0 modifications improve both the rate and level of light-induced**

3 **expression. A.** Schematic comparing TAE1.0 and TAE1.2.0. TAE1.0 consists of the TAE1

4 transcription factor that lacks an NLS and the C120T promoter containing a minimal TATA box

5 sequence. TAE1.2.0 consists of the TAE1-N transcription factor with a C-terminal NLS and the

6 C120F promoter containing the basal promoter from the mouse *Fos* gene. **B.** Comparison of

7 light-induced mCherry expression over time using TAE1.0 (black, dots) or TAE1.2.0 (blue,

8 squares). *Tg(C120T:mCherry)* or *Tg(C120F:mCherry)* embryos were injected with mRNA for

9 TAE1 or TAE1-N, respectively. mCherry expression was activated by illuminating embryos with

10 blue light (pulsed at a frequency of 1 hour on/1 hour off), starting at 3 hours post-fertilization.

11 mCherry transcript levels were measured by qPCR at the indicated time points and normalized

12 to 0 h post-activation. Y-axis is set at  $\log_2$  scale. Dots and squares represent biological

13 replicates. Solid lines represent mean. Error bars represent S.D.

14

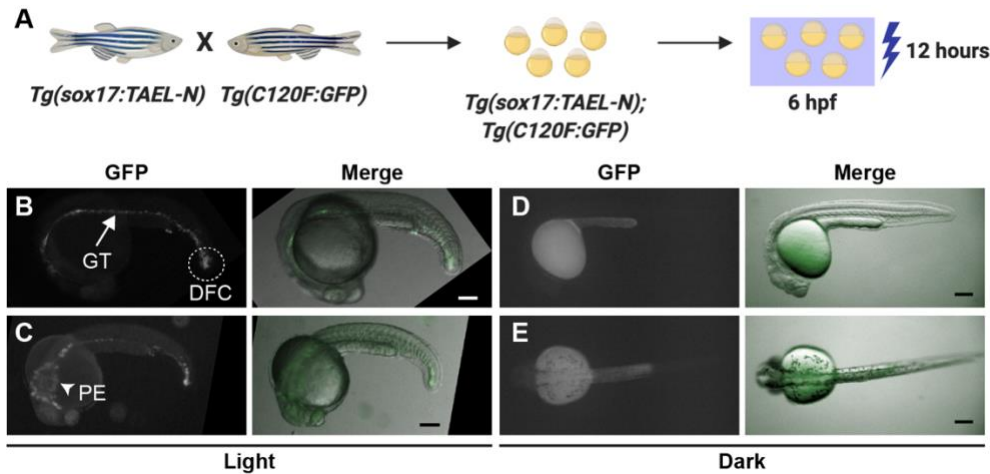

1  
2  
3  
4  
5  
6  
7  
8  
9  
10  
11  
12

**Figure 4. The stable transgenic line *Tg(sox17:TAEL-N)* restricts light-induced expression to endoderm-derived tissues.** **A** Schematic depicting experimental design. *Tg(sox17:TAEL-N)* and *Tg(C120F:GFP)* adult zebrafish were crossed to produce double transgenic embryos. GFP expression was activated by illuminating embryos for 12 hours, starting at 6 hours post-fertilization (hpf), with blue light pulsed at a frequency of 1 hour on/1 hour off. **B-E.** Representative images of *Tg(sox17:TAEL-N);Tg(C120F:GFP)* embryos exposed to blue light (B-C) or kept in the dark (D-E). Images were acquired between 18 and 20 hours post-activation. Arrow in (B) indicates gut tube (GT). Dashed lines in (B) indicate derivatives of the dorsal forerunner cells (DFC). Arrowhead in (C) indicates pharyngeal endoderm (PE). B, D are lateral views, anterior to the left. C, E are dorsal views, anterior to the left. Scale bars, 200  $\mu$ m.

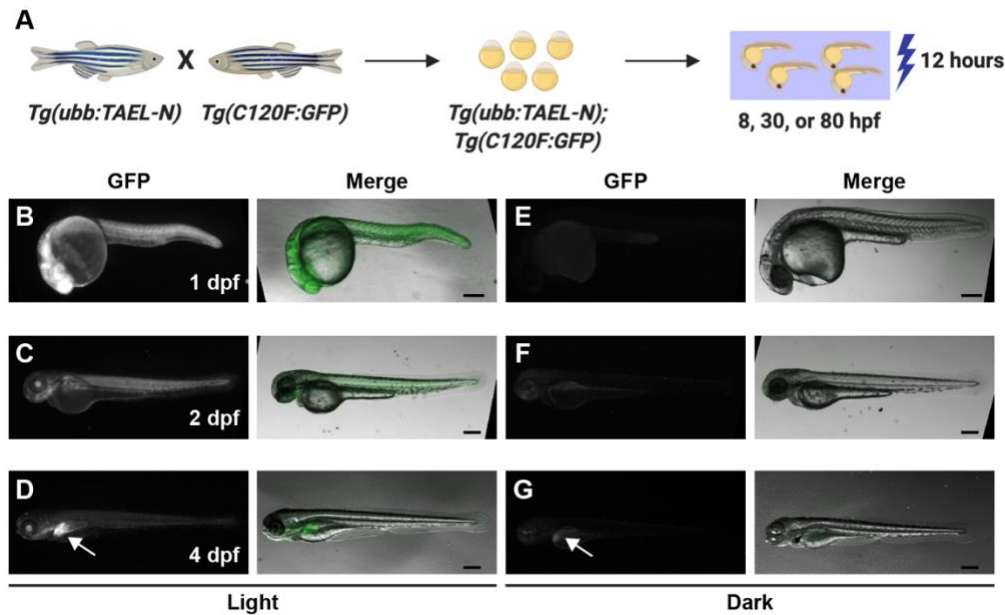

1  
2 **Figure 5. The stable transgenic line *Tg(ubb:TAEL-N)* enables light-induced expression at**  
3 **multiple developmental stages.** A. Schematic depicting experimental design. *Tg(ubb:TAEL-N)*  
4 *and Tg(C120F:GFP)* adult zebrafish were crossed together to produce double transgenic  
5 embryos. GFP expression was activated at multiple time points by illuminating embryos for 12  
6 hours with blue light pulsed at a frequency of 1 hour on/1 hour off. hpf, hours post-fertilization.  
7 **B-G.** Representative images of *Tg(ubb:TAEL-N);Tg(C120F:GFP)* embryos or larvae exposed to  
8 blue light (B-D) or kept in the dark (E-G). Images were acquired at the indicated stages between  
9 18 and 20 hours post-activation. dpf, days post-fertilization. Arrows in (D, G) point to ectopic  
10 liver expression of GFP. Scale bars, 200 nm.

11

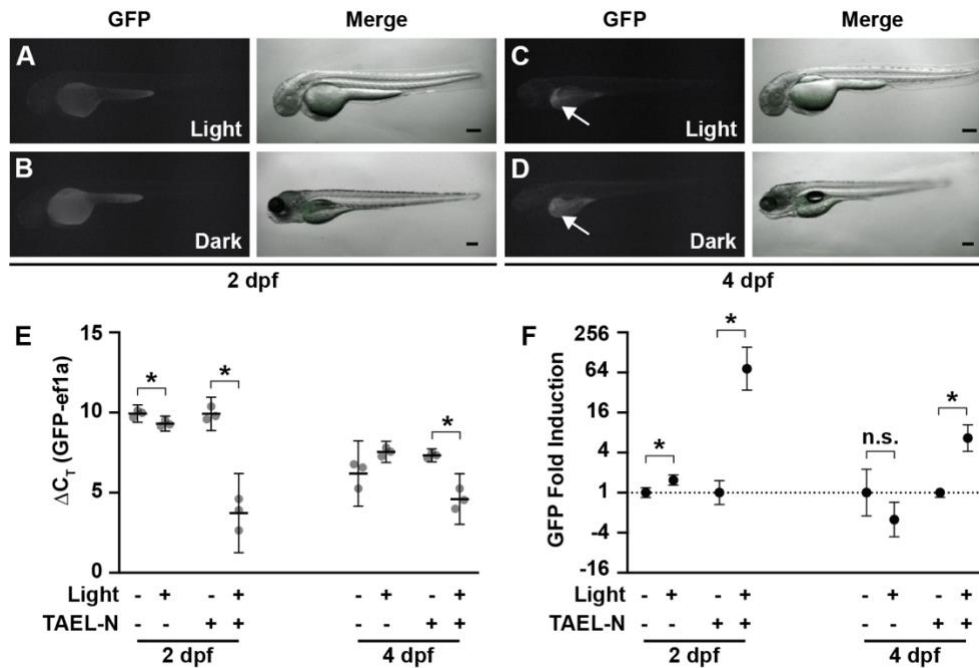

1  
2 **Figure 6. Basal expression from *Tg(C120F:GFP)* is not responsive to light. A-D.**  
3 Representative images of *Tg(C120:GFP)* embryos at 2 days post-fertilization (dpf) (A-B) or  
4 larvae at 4 dpf (C-D). Embryos were illuminated for 12 hours with blue light pulsed at a  
5 frequency of 1 hour on/1 hour off (A, C) or kept in the dark (B, D). Images were acquired  
6 between 18 and 20 hours after exposure to the pulsed light regime. Arrows in (C, D) point to  
7 ectopic liver expression of GFP. Scale bars, 200 nm. **E.** qPCR analysis of GFP expression from  
8 *Tg(C120:GFP)* or *Tg(C120F:GFP);Tg(ubb:TAEL-N)* zebrafish at 2 or 4 dpf illuminated with  
9 constant blue light for 1 hour or kept in the dark. Data are presented as  $\Delta C_T$  values normalized  
10 to the housekeeping gene *ef1a*. Dots represent biological replicates. Solid lines represent mean.  
11 Error bars represent S.D. \* $p < 0.05$ . **F.** Fold induction of GFP expression in response to light  
12 calculated from the same qPCR analysis shown in (E). Y-axis is set at log<sub>2</sub> scale. Data are  
13 presented as mean  $\pm$  S.D. \* $p < 0.05$ . n.s., not significant.

14
